# Supplementary material
Source: PubMed Central journal article supplement (PMC2703740)
Supplement: NIHMS74030-supplement-01.pdf [file NIHMS74030-supplement-01.pdf]

## Regulation of Feeding and Metabolism by Neuronal and Peripheral Clocks in *Drosophila*

Kanyan Xu, Xiangzhong Zheng, and Amita Sehgal

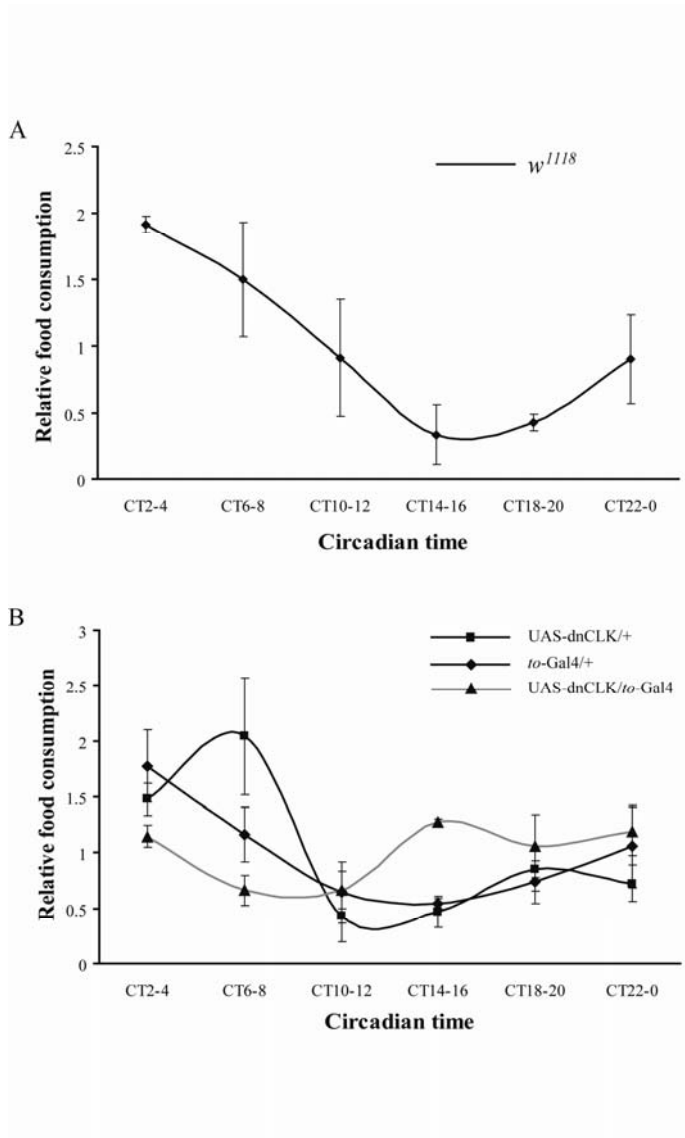

**Figure S1. A *Drosophila* feeding rhythm measured by the CAFÉ assay**

(A) *w<sup>1118</sup>* flies exhibit a rhythmic feeding pattern in DD.

(B) Flies with a disrupted fat body clock show an altered phase of feeding.

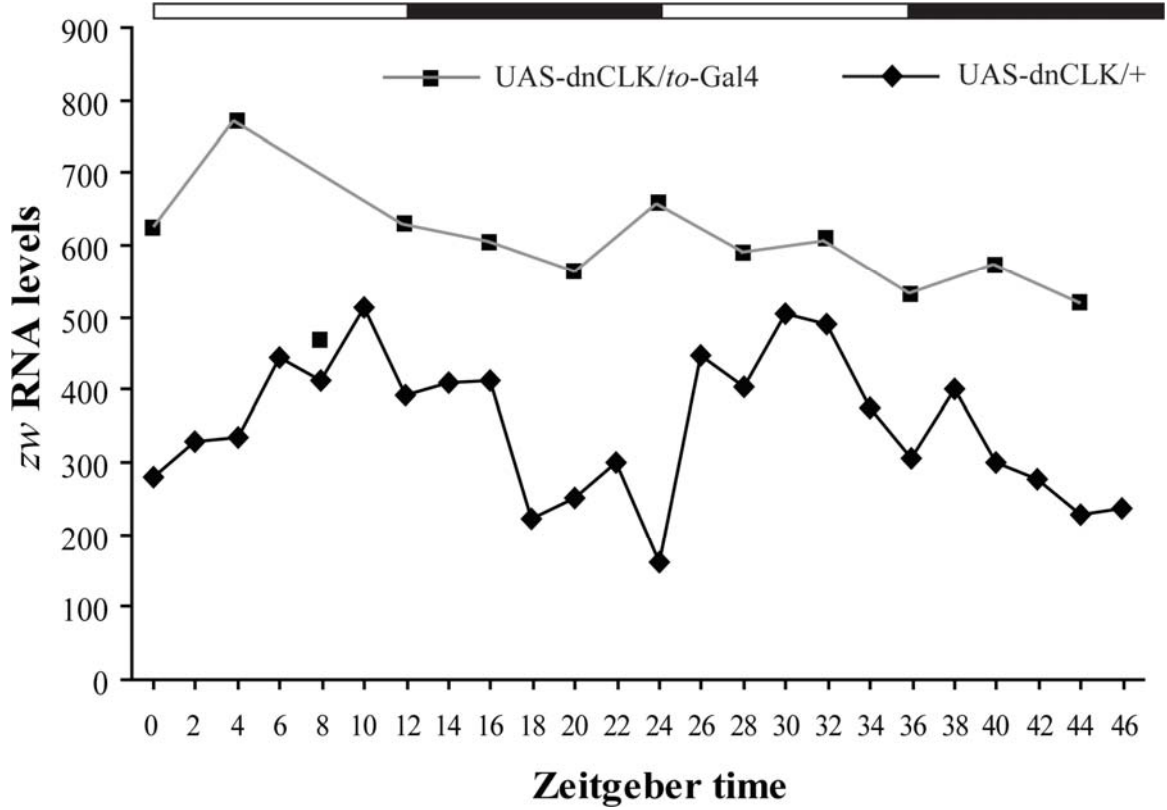

**Figure S2. *zW* cycles in the fat body of control flies carrying UAS-dnCLK alone, but not in the fat body of flies carrying both UAS-dnCLK and *to*-Gal4.**

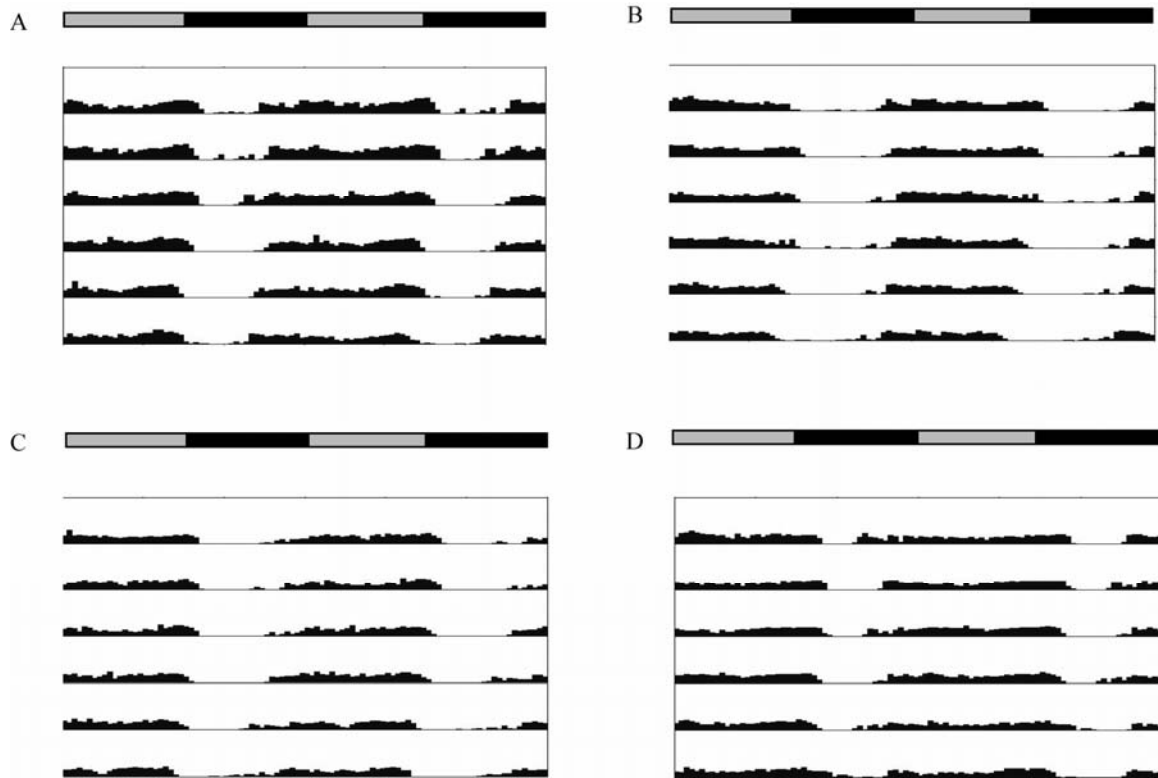

**Figure S3. Locomotor activity rhythms do not change in flies with a disrupted fat body clock.**

(A) and (B) Activity records of two representative flies carrying UAS-dnCLK and *to-Gal4*. (C) and (D) Activity records of two control flies carrying only UAS-dnCLK.

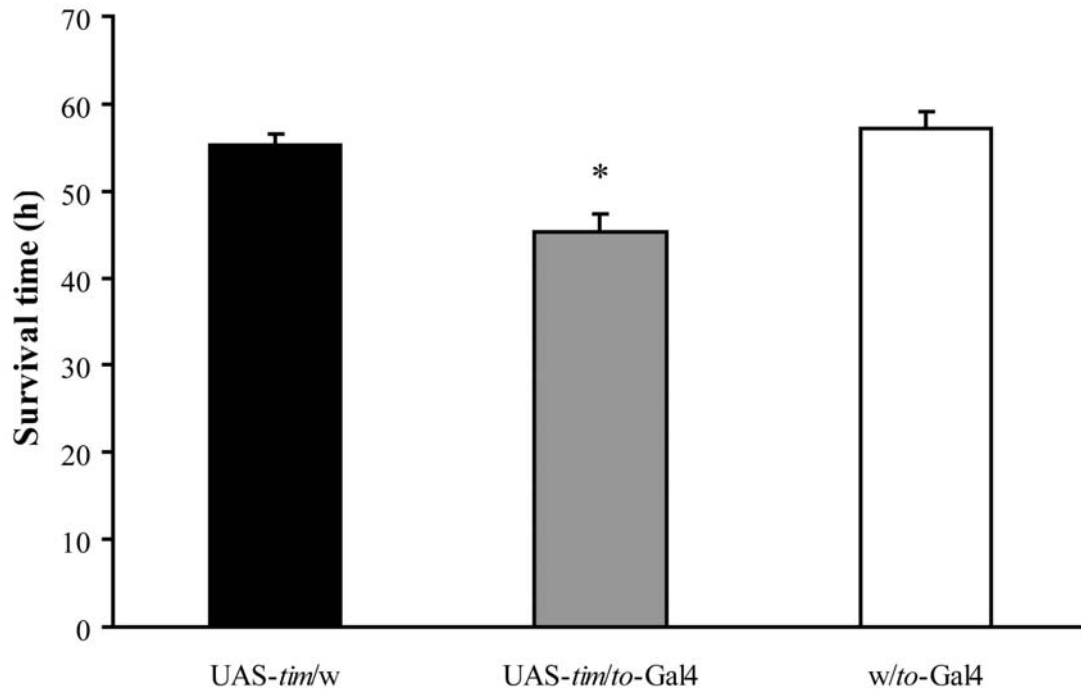

**Figure S4. Overexpressing TIM in the fat body increases sensitivity to starvation.**

The phenotype is weaker than that produced by overexpressing dnCLK. Asterisks indicate significant difference ( $p < 0.05$ ). Statistical significance was determined by two-tailed Student's t-test with unequal variance.

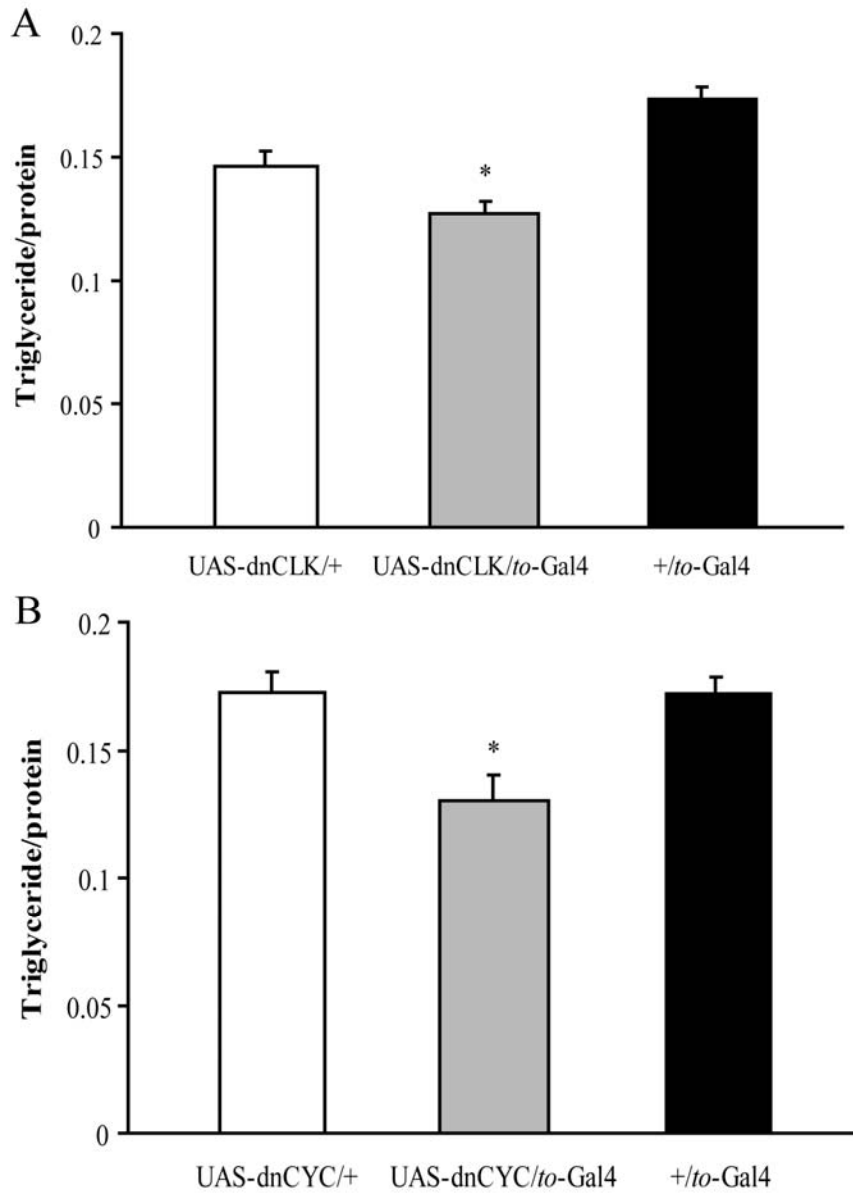

**Figure S5. The clock in the fat body affects lipid storage.**

Triglyceride levels are lower in male flies carrying either UAS-dnCLK and *to*-Gal4 (A) or UAS-dnCYC and *to*-Gal4 (B). Asterisks indicate significant differences ( $p < 0.05$ ). Statistical significance was determined by two-tailed Student's t-test with unequal variance.

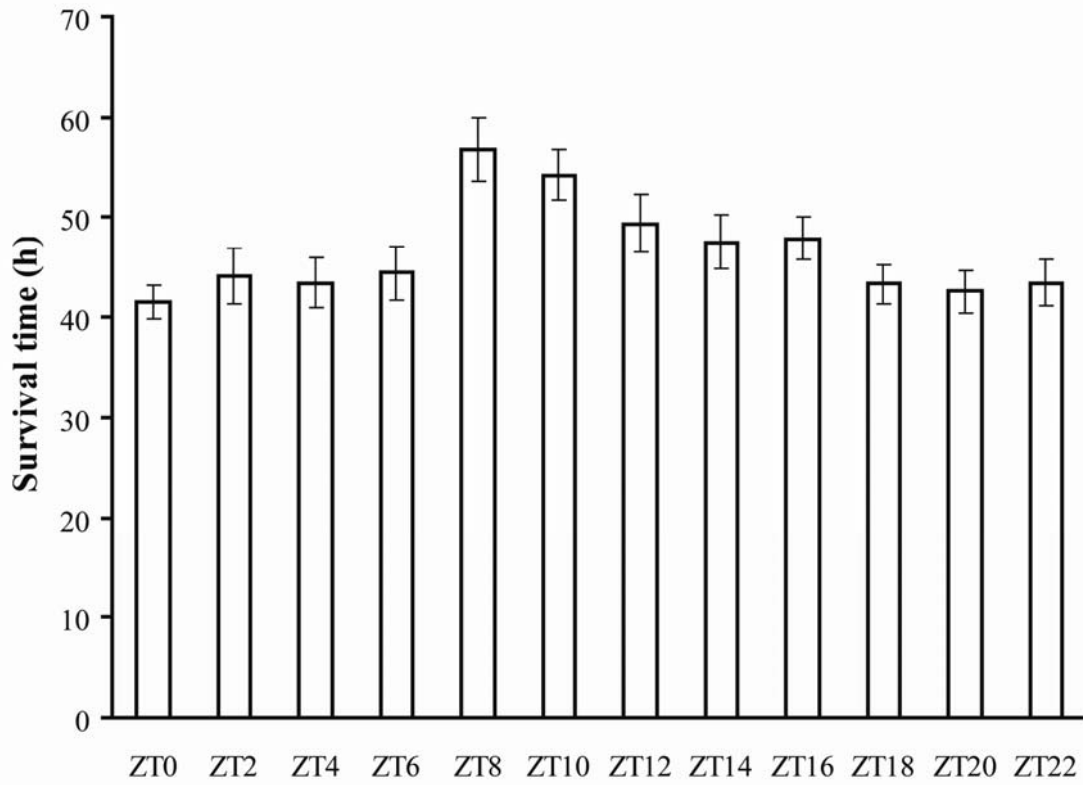

**Figure S6. The response to starvation varies at different times of day in an LD cycle.**

Starvation was initiated at the times shown and survival was measured as described earlier. Resistance to starvation was greatest at ZT8 and ZT10.
